# Supplementary material
Source: PubMed Central journal article supplement (PMC517858)
Supplement: cmaj_171_7_735__1.pdf [file cmaj_171_7_735__1.pdf]

---

**e-Appendix: Amount of data required for meta-analysis of fully reported outcomes**

---

| Type of outcome data     | Required for meta-analysis                                                                                                                                                                                                                                                                                                                                                                 |
|--------------------------|--------------------------------------------------------------------------------------------------------------------------------------------------------------------------------------------------------------------------------------------------------------------------------------------------------------------------------------------------------------------------------------------|
| Unpaired continuous data | <ul style="list-style-type: none"> <li>• Sample size in each group;</li> <li>• Magnitude of treatment effect (group means/medians or difference in means/medians); and</li> <li>• Measure of precision or variability (confidence interval, standard deviation or standard error for means; interquartile or other range for medians) or the precise p value*</li> </ul>                   |
| Unpaired binary data     | <ul style="list-style-type: none"> <li>• Sample size in each group; and</li> </ul> <p>Either</p> <ul style="list-style-type: none"> <li>• Number (or percent) of participants with event for each group; or</li> <li>• Odds ratio or relative risk with measure of precision or variability (confidence interval, standard deviation or standard error) or the precise p value*</li> </ul> |
| Paired continuous data   | <ul style="list-style-type: none"> <li>• Sample size in each group; and</li> </ul> <p>Either</p> <ul style="list-style-type: none"> <li>• Mean difference between groups and a measure of its precision, variability or precise p value; or</li> <li>• Raw data for each participant</li> </ul>                                                                                            |
| Paired binary data       | <ul style="list-style-type: none"> <li>• Sample size in each group; and</li> <li>• Paired numbers of participants with and without events</li> </ul>                                                                                                                                                                                                                                       |
| Survival data            | <p>Either</p> <ul style="list-style-type: none"> <li>• Kaplan-Meier curve or similar, with numbers of patients at risk over time; or</li> <li>• Hazard ratio with a measure of precision, and sample size in each group</li> </ul>                                                                                                                                                         |

\*Sample sizes, treatment effect and precise p value enable the calculation of a standard error if a measure of precision or variability is not reported.
